# Supplementary material for: Protein kinase inhibitor responses in uveal melanoma reflects a diminished dependency on PKC-MAPK signaling
Source: PubMed Central journal article supplement (PMC9576594; doi:10.1038/s41417-022-00457-2), 2022-03-29
Supplement: 41417_2022_457_MOESM1_ESM.pdf [file 41417_2022_457_MOESM1_ESM.pdf]

**Table S1 Cell cycle distribution data of uveal melanoma cells treated with protein kinase C (PKC) inhibitors IDE196 or AEB071**

| Cell Lines | PKC inhibitor | Response type | 5 $\mu$ M IDE196 |          | 1 $\mu$ M IDE196 |          | 5 $\mu$ M AEB071 |          | 2 $\mu$ M AEB071 |          |
|------------|---------------|---------------|------------------|----------|------------------|----------|------------------|----------|------------------|----------|
|            |               |               | % S phase        | % Sub G1 | % S phase        | % Sub G1 | % S phase        | % Sub G1 | % S phase        | % Sub G1 |
| Mel285     | -             | Resistant     | 14.2             | 1.1      | 14.2             | 1.1      | 11.7             | 1.7      | 11.7             | 1.7      |
| Mel285     | +             | Resistant     | 12.9             | 0.9      | 13.9             | 1.0      | 8.3              | 1.7      | 10.1             | 1.4      |
| Mel290     | -             | Resistant     | 7.4              | 0.0      | 7.4              | 0.0      | 7.2              | 0.1      | 7.2              | 0.1      |
| Mel290     | +             | Resistant     | 6.1              | 0.1      | 6.4              | 0.1      | 2.1              | 0.0      | 5.4              | 0.1      |
| 92.1       | -             | Cytostatic    | 29.7             | 0.6      | 29.7             | 0.6      | 30.6             | 0.8      | 30.6             | 0.8      |
| 92.1       | +             | Cytostatic    | 1.2              | 15.4     | 3.9              | 3.8      | 2.5              | 1.3      | 4.3              | 4.1      |
| Mel202     | -             | Cytostatic    | 27.9             | 0.2      | 27.9             | 0.2      | 31.4             | 0.1      | 31.4             | 0.1      |
| Mel202     | +             | Cytostatic    | 9.9              | 3.6      | 10.7             | 1.4      | 11.2             | 6.5      | 9.7              | 2.8      |
| Mel270     | -             | Cyototoxic    | 19.1             | 0.7      | 19.1             | 0.7      | 20.5             | 0.5      | 20.5             | 0.5      |
| Mel270     | +             | Cyototoxic    | 5.3              | 61.2     | 4.2              | 65.7     | 4.6              | 29.2     | 5.1              | 30.6     |
| OMM1.3     | -             | Cytostatic    | 28.1             | 0.2      | 28.1             | 0.2      | 32.7             | 0.3      | 32.7             | 0.3      |
| OMM1.3     | +             | Cytostatic    | 4.5              | 3.8      | 4.5              | 8.6      | 4.6              | 3.3      | 9.0              | 3.0      |
| OMM1.5     | -             | Cytostatic    | 25.5             | 2.0      | 25.5             | 2.0      | 27.0             | 1.3      | 27.0             | 1.3      |
| OMM1.5     | +             | Cytostatic    | 3.8              | 4.6      | 3.8              | 4.6      | 5.9              | 3.6      | 5.5              | 3.5      |
| MP38       | -             | Cytostatic    | 11.1             | 0.2      | 11.1             | 0.2      | 10.8             | 0.4      | 10.8             | 0.4      |
| MP38       | +             | Cytostatic    | 3.2              | 1.1      | 5.3              | 0.6      | 5.6              | 0.7      | 9.1              | 0.5      |
| MP46       | -             | Cytostatic    | 23.8             | 7.8      | 23.8             | 7.8      | 22.5             | 3.3      | 22.5             | 3.2      |
| MP46       | +             | Cytostatic    | 9.5              | 9.5      | 11.9             | 9.7      | 14.7             | 5.1      | 14.9             | 5.9      |
| OMM1       | -             | Cyototoxic    | 32.1             | 1.8      | 32.1             | 1.8      | 30.3             | 1.1      | 30.3             | 1.1      |
| OMM1       | +             | Cyototoxic    | 17.2             | 52.0     | 24.9             | 38.4     | 20.9             | 34.9     | 27.8             | 30.3     |
| MP41       | -             | Cytostatic    | 24.6             | 1.0      | 24.6             | 1.0      | 24.7             | 0.8      | 24.7             | 0.8      |
| MP41       | +             | Cytostatic    | 3.1              | 3.2      | 4.4              | 2.5      | 3.3              | 0.8      | 5.0              | 0.9      |

Data are the average of at least three biological replicates

**Table S2 Preranked geneset enrichment analysis comparing PKC inhibitor- versus control-treated Mel270 uveal melanoma cell line**

| NAME                                       | SIZE* | ES         | NES        | NOM p-val   | FDR q-val  |
|--------------------------------------------|-------|------------|------------|-------------|------------|
| HALLMARK_PROTEIN_SECRETION                 | 41    | 0.35552156 | 1.9543794  | 0.003125    | 0.03183081 |
| HALLMARK_CHOLESTEROL_HOMEOSTASIS           | 39    | 0.34009954 | 1.8353789  | 0.003378379 | 0.04084871 |
| HALLMARK_HEME_METABOLISM                   | 80    | 0.2705555  | 1.7902172  | 0.007843138 | 0.0364024  |
| HALLMARK_MYOGENESIS                        | 58    | 0.26834813 | 1.6657465  | 0.017985612 | 0.06430768 |
| HALLMARK_MITOTIC_SPINDLE                   | 73    | 0.22429891 | 1.5008874  | 0.017777778 | 0.14021592 |
| HALLMARK_ADIPOGENESIS                      | 88    | 0.19336279 | 1.3648218  | 0.061320756 | 0.23424698 |
| HALLMARK_BILE_ACID_METABOLISM              | 29    | 0.25977308 | 1.2720866  | 0.15542522  | 0.32259548 |
| YAP1_UP                                    | 14    | 0.32472456 | 1.2230203  | 0.21938775  | 0.35354346 |
| HALLMARK_INTERFERON_ALPHA_RESPONSE         | 33    | 0.23495534 | 1.2209482  | 0.19020173  | 0.31721726 |
| HALLMARK_PEROXISOME                        | 40    | 0.2041939  | 1.1388118  | 0.2861635   | 0.40473446 |
| HALLMARK_FATTY_ACID_METABOLISM             | 72    | 0.17167652 | 1.1230505  | 0.27659574  | 0.39097106 |
| HALLMARK_PI3K_AKT_MTOR_SIGNALING           | 49    | 0.1874609  | 1.0959275  | 0.3028169   | 0.40036893 |
| HALLMARK_XENOBIOTIC_METABOLISM             | 71    | 0.16025962 | 1.0656121  | 0.3231441   | 0.41639012 |
| HALLMARK_APICAL_JUNCTION                   | 67    | 0.15530641 | 0.9956903  | 0.48062015  | 0.5002682  |
| HALLMARK_OXIDATIVE_PHOSPHORYLATION         | 90    | 0.12365571 | 0.8770987  | 0.6492891   | 0.65099233 |
| MAPK Signaling V2                          | 45    | -0.9043531 | -4.3440814 | 0           | 0          |
| HALLMARK_MYC_TARGETS_V2                    | 51    | -0.6880464 | -3.4035542 | 0           | 0          |
| MAPK Signaling V1                          | 27    | -0.796536  | -3.386963  | 0           | 0          |
| HALLMARK_TNFA_SIGNALING_VIA_NFKB           | 94    | -0.4968598 | -2.8191597 | 0           | 0          |
| HALLMARK_MYC_TARGETS_V1                    | 126   | -0.4705812 | -2.7702599 | 0           | 0          |
| HALLMARK_IL2_STAT5_SIGNALING               | 90    | -0.4481024 | -2.5309303 | 0           | 0          |
| HALLMARK_E2F_TARGETS                       | 70    | -0.4338211 | -2.2805126 | 0           | 3.95E-04   |
| HALLMARK_KRAS_SIGNALING_UP                 | 57    | -0.4413556 | -2.2384841 | 0           | 4.74E-04   |
| HALLMARK_UNFOLDED_PROTEIN_RESPONSE         | 69    | -0.4052557 | -2.1830726 | 0           | 8.52E-04   |
| HALLMARK_COMPLEMENT                        | 60    | -0.4022088 | -2.075302  | 0           | 0.00158165 |
| HALLMARK_COAGULATION                       | 42    | -0.4446047 | -2.072712  | 0           | 0.00143787 |
| HALLMARK_ALLOGRAFT_REJECTION               | 44    | -0.4292351 | -2.0350122 | 0           | 0.00243398 |
| HALLMARK_GLYCOLYSIS                        | 82    | -0.3634427 | -1.9952645 | 0           | 0.00327154 |
| HALLMARK_UV_RESPONSE_UP                    | 74    | -0.3539345 | -1.8797234 | 0.00257732  | 0.00755535 |
| HALLMARK_ANDROGEN_RESPONSE                 | 56    | -0.3689057 | -1.8480057 | 0.004081633 | 0.01008498 |
| HALLMARK_INFLAMMATORY_RESPONSE             | 56    | -0.3568153 | -1.7883152 | 0.004065041 | 0.0157092  |
| HALLMARK_ESTROGEN_RESPONSE_EARLY           | 86    | -0.3006454 | -1.6494657 | 0.008805032 | 0.04173814 |
| HALLMARK_MTORC1_SIGNALING                  | 115   | -0.2757017 | -1.6464698 | 0.007462686 | 0.04017502 |
| HALLMARK_WNT_BETA_CATENIN_SIGNALING        | 19    | -0.438736  | -1.6338125 | 0.037459284 | 0.04134335 |
| HALLMARK_REACTIVE_OXYGEN_SPECIES_PATHWAY   | 24    | -0.4008331 | -1.6061797 | 0.04105572  | 0.04666503 |
| HALLMARK_APOPTOSIS                         | 68    | -0.3038231 | -1.5893749 | 0.014304291 | 0.04928973 |
| HALLMARK_HYPOXIA                           | 95    | -0.2766756 | -1.5646012 | 0.03345725  | 0.05512825 |
| HALLMARK_G2M_CHECKPOINT                    | 76    | -0.2921255 | -1.5477916 | 0.025435073 | 0.0585655  |
| HALLMARK_P53_PATHWAY                       | 88    | -0.2677643 | -1.4733243 | 0.04928664  | 0.08987591 |
| HALLMARK_NOTCH_SIGNALING                   | 11    | -0.4587637 | -1.4175186 | 0.109350234 | 0.11798614 |
| HALLMARK_TGF_BETA_SIGNALING                | 27    | -0.327182  | -1.3615142 | 0.1337386   | 0.15183696 |
| HALLMARK_UV_RESPONSE_DN                    | 80    | -0.2430972 | -1.3319138 | 0.11973684  | 0.16927467 |
| HALLMARK_IL6_JAK_STAT3_SIGNALING           | 23    | -0.3229279 | -1.2647998 | 0.20276497  | 0.22358574 |
| HALLMARK_INTERFERON_GAMMA_RESPONSE         | 62    | -0.242559  | -1.2576683 | 0.18741633  | 0.22294049 |
| HALLMARK_EPITHELIAL_MESENCHYMAL_TRANSITION | 75    | -0.216455  | -1.1631231 | 0.25096524  | 0.32300726 |
| HALLMARK_ESTROGEN_RESPONSE_LATE            | 73    | -0.2003967 | -1.0917333 | 0.34031415  | 0.405842   |
| HALLMARK_KRAS_SIGNALING_DN                 | 38    | -0.2176059 | -0.9832861 | 0.4848485   | 0.5499188  |
| HALLMARK_ANGIOGENESIS                      | 11    | -0.3040385 | -0.9702917 | 0.47682118  | 0.55255866 |
| HALLMARK_DNA_REPAIR                        | 52    | -0.160704  | -0.8132291 | 0.7239513   | 0.76923996 |
| HALLMARK_APICAL_SURFACE                    | 13    | -0.2344968 | -0.7758745 | 0.74957985  | 0.79796237 |
| HALLMARK_SPERMATOGENESIS                   | 25    | -0.1796924 | -0.7312603 | 0.8021148   | 0.82757276 |

ES, Enrichment score

NES, Normalised enrichment score

NOM p-value, Nominal p value

FDR q-value, False discovery rate

\*Number of genes in the the gene set after filtering genes not in the expression dataset

**Table S3 Preranked geneset enrichment analysis comparing PKC inhibitor- versus control-treated OMM1.3 uveal melanoma cell line**

| NAME                                       | SIZE* | ES         | NES        | NOM p-val   | FDR q-val  |
|--------------------------------------------|-------|------------|------------|-------------|------------|
| HALLMARK_CHOLESTEROL_HOMEOSTASIS           | 28    | 0.5105943  | 2.656983   | 0           | 0          |
| HALLMARK_APICAL_JUNCTION                   | 54    | 0.27038708 | 1.7495683  | 0.004830918 | 0.09268095 |
| HALLMARK_HEME_METABOLISM                   | 68    | 0.24924944 | 1.7013255  | 0.011111111 | 0.07974342 |
| HALLMARK_BILE_ACID_METABOLISM              | 23    | 0.34493575 | 1.7000505  | 0.01618123  | 0.06073983 |
| HALLMARK_INTERFERON_ALPHA_RESPONSE         | 31    | 0.2783709  | 1.5035703  | 0.05882353  | 0.16275918 |
| HALLMARK_KRAS_SIGNALING_DN                 | 29    | 0.27381226 | 1.4410456  | 0.06271777  | 0.18355565 |
| HALLMARK_PEROXISOME                        | 37    | 0.25181556 | 1.4158772  | 0.06909091  | 0.17914084 |
| HALLMARK_EPITHELIAL_MESENCHYMAL_TRANSITION | 62    | 0.19217308 | 1.2894152  | 0.14220184  | 0.2869846  |
| HALLMARK_XENOBIOTIC_METABOLISM             | 66    | 0.18341698 | 1.2100248  | 0.23451327  | 0.36291468 |
| HALLMARK_MYOGENESIS                        | 55    | 0.18464121 | 1.1774857  | 0.21719457  | 0.37799564 |
| HALLMARK_FATTY_ACID_METABOLISM             | 55    | 0.18078801 | 1.1439279  | 0.29577464  | 0.39240074 |
| HALLMARK_MITOTIC_SPINDLE                   | 67    | 0.16432121 | 1.1369663  | 0.23671497  | 0.37140548 |
| YAP1_UP                                    | 14    | 0.22673638 | 0.8803182  | 0.59052926  | 0.78906345 |
| HALLMARK_IL6_JAK_STAT3_SIGNALING           | 17    | 0.19380076 | 0.81587285 | 0.6727829   | 0.8369996  |
| HALLMARK_PI3K_AKT_MTOR_SIGNALING           | 42    | 0.10995829 | 0.6648202  | 0.87053573  | 0.96653694 |
| HALLMARK_INTERFERON_GAMMA_RESPONSE         | 56    | 0.09516167 | 0.62018055 | 0.94849783  | 0.93949103 |
| MAPK Signaling V2                          | 45    | -0.8697477 | -4.192273  | 0           | 0          |
| MAPK Signaling V1                          | 24    | -0.8344674 | -3.375727  | 0           | 0          |
| HALLMARK_MYC_TARGETS_V2                    | 52    | -0.6153655 | -3.0690699 | 0           | 0          |
| HALLMARK_MYC_TARGETS_V1                    | 135   | -0.4639472 | -2.801597  | 0           | 0          |
| HALLMARK_TNFA_SIGNALING_VIA_NFKB           | 96    | -0.4512871 | -2.5900338 | 0           | 0          |
| HALLMARK_UNFOLDED_PROTEIN_RESPONSE         | 68    | -0.4734384 | -2.531077  | 0           | 0          |
| HALLMARK_E2F_TARGETS                       | 96    | -0.4435486 | -2.480278  | 0           | 0          |
| HALLMARK_IL2_STAT5_SIGNALING               | 78    | -0.4244774 | -2.302123  | 0           | 4.38E-04   |
| HALLMARK_UV_RESPONSE_UP                    | 65    | -0.4013015 | -2.1261473 | 0           | 0.00128943 |
| HALLMARK_G2M_CHECKPOINT                    | 85    | -0.3792525 | -2.1156983 | 0.001199041 | 0.00142759 |
| HALLMARK_HEDGEHOG_SIGNALING                | 14    | -0.5910172 | -1.9884993 | 0.002902758 | 0.00399712 |
| HALLMARK_COMPLEMENT                        | 54    | -0.3890947 | -1.9684567 | 0           | 0.00450192 |
| HALLMARK_ESTROGEN_RESPONSE_EARLY           | 74    | -0.3420985 | -1.8633506 | 0.006297229 | 0.01128497 |
| HALLMARK_NOTCH_SIGNALING                   | 12    | -0.5283984 | -1.6967478 | 0.017080745 | 0.03626061 |
| HALLMARK_KRAS_SIGNALING_UP                 | 55    | -0.3314411 | -1.678077  | 0.016795866 | 0.03843789 |
| HALLMARK_GLYCOLYSIS                        | 73    | -0.3045951 | -1.6702735 | 0.012269938 | 0.03787533 |
| HALLMARK_MTORC1_SIGNALING                  | 105   | -0.2846448 | -1.6422013 | 0.014319809 | 0.04296818 |
| HALLMARK_INFLAMMATORY_RESPONSE             | 49    | -0.3113645 | -1.5160452 | 0.062337663 | 0.09539565 |
| HALLMARK_ANDROGEN_RESPONSE                 | 44    | -0.2996694 | -1.430291  | 0.08377659  | 0.14754075 |
| HALLMARK_ALLOGRAFT_REJECTION               | 41    | -0.300817  | -1.4232167 | 0.09139785  | 0.14598949 |
| HALLMARK_ESTROGEN_RESPONSE_LATE            | 57    | -0.2622454 | -1.3263744 | 0.14012739  | 0.22631517 |
| HALLMARK_DNA_REPAIR                        | 63    | -0.2516645 | -1.3182757 | 0.11720698  | 0.22502989 |
| HALLMARK_PROTEIN_SECRETION                 | 26    | -0.3165565 | -1.3127619 | 0.15714286  | 0.22081989 |
| HALLMARK_P53_PATHWAY                       | 81    | -0.2302435 | -1.2735578 | 0.15917376  | 0.25294754 |
| HALLMARK_TGF_BETA_SIGNALING                | 30    | -0.2885249 | -1.2395627 | 0.2200282   | 0.28201476 |
| HALLMARK_WNT_BETA_CATENIN_SIGNALING        | 24    | -0.3065941 | -1.2357075 | 0.21480407  | 0.27587956 |
| HALLMARK_APOPTOSIS                         | 59    | -0.2299549 | -1.1929116 | 0.24177215  | 0.31585085 |
| HALLMARK_APICAL_SURFACE                    | 12    | -0.3485527 | -1.1093022 | 0.35191083  | 0.41205016 |
| HALLMARK_HYPOXIA                           | 80    | -0.2040796 | -1.1059246 | 0.33616504  | 0.4030483  |
| HALLMARK_UV_RESPONSE_DN                    | 71    | -0.1826215 | -0.9771295 | 0.5124378   | 0.57752246 |
| HALLMARK_REACTIVE_OXYGEN_SPECIES_PATHWAY   | 18    | -0.2694655 | -0.9603014 | 0.51780415  | 0.58443105 |
| HALLMARK_ADIPOGENESIS                      | 67    | -0.1577214 | -0.850439  | 0.67206985  | 0.732647   |
| HALLMARK_COAGULATION                       | 45    | -0.1623898 | -0.7809164 | 0.7642384   | 0.80532336 |
| HALLMARK_OXIDATIVE_PHOSPHORYLATION         | 61    | -0.1251184 | -0.6650697 | 0.87913483  | 0.91074115 |
| HALLMARK_SPERMATOGENESIS                   | 27    | -0.1523897 | -0.6289954 | 0.9033189   | 0.91499346 |

ES, Enrichment score

NES, Normalised enrichment score

NOM p-value, Nominal p value

FDR q-value, False discovery rate

\*Number of genes in the the gene set after filtering genes not in the expression dataset

**Table S4 Preranked geneset enrichment analysis comparing PKC inhibitor- versus control-treated MP38 uveal melanoma cell line**

| NAME                                       | SIZE* | ES         | NES        | NOM p-val   | FDR q-val  |
|--------------------------------------------|-------|------------|------------|-------------|------------|
| HALLMARK_UV_RESPONSE_DN                    | 43    | 0.39729747 | 2.496082   | 0           | 0          |
| HALLMARK_MITOTIC_SPINDLE                   | 46    | 0.29698822 | 1.8645478  | 0.002141328 | 0.07939816 |
| HALLMARK_APICAL_JUNCTION                   | 30    | 0.3285541  | 1.8265758  | 0.006681514 | 0.06551886 |
| HALLMARK_INTERFERON_ALPHA_RESPONSE         | 12    | 0.40024826 | 1.4750972  | 0.077568136 | 0.3914901  |
| HALLMARK_PI3K_AKT_MTOR_SIGNALING           | 31    | 0.2605358  | 1.4714326  | 0.07261411  | 0.3183224  |
| YAP1_UP                                    | 12    | 0.3896555  | 1.4670557  | 0.08181818  | 0.2696664  |
| HALLMARK_APOPTOSIS                         | 46    | 0.22502099 | 1.4216101  | 0.06880734  | 0.29223317 |
| HALLMARK_BILE_ACID_METABOLISM              | 16    | 0.33676732 | 1.3887641  | 0.116630666 | 0.3016677  |
| HALLMARK_HEME_METABOLISM                   | 48    | 0.2137625  | 1.3736396  | 0.11293635  | 0.28645095 |
| HALLMARK_P53_PATHWAY                       | 57    | 0.20210463 | 1.3608133  | 0.12195122  | 0.27245384 |
| HALLMARK_TGF_BETA_SIGNALING                | 20    | 0.28080806 | 1.329926   | 0.13978495  | 0.2791529  |
| HALLMARK_COAGULATION                       | 21    | 0.28328523 | 1.3280321  | 0.15367965  | 0.25843593 |
| HALLMARK_CHOLESTEROL_HOMEOSTASIS           | 22    | 0.26031688 | 1.2503935  | 0.19027483  | 0.32532638 |
| HALLMARK_PEROXISOME                        | 19    | 0.26910734 | 1.2207451  | 0.20474137  | 0.3407606  |
| HALLMARK_MYOGENESIS                        | 36    | 0.21336329 | 1.2178637  | 0.22736841  | 0.32181486 |
| HALLMARK_ANDROGEN_RESPONSE                 | 25    | 0.23555301 | 1.1983209  | 0.25373134  | 0.3252242  |
| HALLMARK_EPITHELIAL_MESENCHYMAL_TRANSITION | 47    | 0.17249943 | 1.1026704  | 0.325       | 0.43089578 |
| HALLMARK_KRAS_SIGNALING_DN                 | 16    | 0.23777708 | 1.0081325  | 0.43412527  | 0.5457183  |
| HALLMARK_FATTY_ACID_METABOLISM             | 30    | 0.17195827 | 0.9291993  | 0.52796423  | 0.63468987 |
| HALLMARK_APICAL_SURFACE                    | 11    | 0.24986759 | 0.92192835 | 0.54968286  | 0.6144306  |
| HALLMARK_XENOBIOTIC_METABOLISM             | 31    | 0.13304333 | 0.73676854 | 0.77896994  | 0.8403224  |
| HALLMARK_PROTEIN_SECRETION                 | 17    | 0.16092534 | 0.68690026 | 0.83027524  | 0.85850376 |
| MAPK Signaling V2                          | 39    | -0.7913364 | -4.610326  | 0           | 0          |
| HALLMARK_MYC_TARGETS_V2                    | 44    | -0.661743  | -3.9949946 | 0           | 0          |
| MAPK Signaling V1                          | 20    | -0.7936011 | -3.5738542 | 0           | 0          |
| HALLMARK_MYC_TARGETS_V1                    | 77    | -0.4768841 | -3.4484365 | 0           | 0          |
| HALLMARK_TNFA_SIGNALING_VIA_NFKB           | 64    | -0.4631783 | -3.2017386 | 0           | 0          |
| HALLMARK_E2F_TARGETS                       | 51    | -0.4772617 | -2.9667883 | 0           | 0          |
| HALLMARK_IL2_STAT5_SIGNALING               | 53    | -0.3656089 | -2.3517218 | 0           | 6.58E-04   |
| HALLMARK_ESTROGEN_RESPONSE_EARLY           | 49    | -0.3496517 | -2.1835122 | 0           | 0.0022812  |
| HALLMARK_COMPLEMENT                        | 35    | -0.3583342 | -1.9872638 | 0.003846154 | 0.00812607 |
| HALLMARK_G2M_CHECKPOINT                    | 56    | -0.3039371 | -1.9196625 | 0.005681818 | 0.01300306 |
| HALLMARK_KRAS_SIGNALING_UP                 | 34    | -0.3329577 | -1.8667588 | 0.009398496 | 0.01735629 |
| HALLMARK_UNFOLDED_PROTEIN_RESPONSE         | 35    | -0.3385014 | -1.8573638 | 0.003669725 | 0.01693923 |
| HALLMARK_MTORC1_SIGNALING                  | 76    | -0.226357  | -1.6358293 | 0.022514071 | 0.0582812  |
| HALLMARK_HYPOXIA                           | 62    | -0.2363153 | -1.60203   | 0.026548672 | 0.06596709 |
| HALLMARK_OXIDATIVE_PHOSPHORYLATION         | 43    | -0.2578217 | -1.5316588 | 0.056179777 | 0.09117929 |
| HALLMARK_DNA_REPAIR                        | 32    | -0.2867427 | -1.5315754 | 0.056420233 | 0.0856058  |
| HALLMARK_UV_RESPONSE_UP                    | 41    | -0.2589209 | -1.5108522 | 0.06679035  | 0.08906081 |
| HALLMARK_ESTROGEN_RESPONSE_LATE            | 45    | -0.2042837 | -1.2719527 | 0.18402778  | 0.2414117  |
| HALLMARK_INFLAMMATORY_RESPONSE             | 31    | -0.2255364 | -1.2114923 | 0.24175824  | 0.28732982 |
| HALLMARK_ALLOGRAFT_REJECTION               | 22    | -0.2577669 | -1.1811918 | 0.25765765  | 0.3046725  |
| HALLMARK_GLYCOLYSIS                        | 61    | -0.1727058 | -1.1625557 | 0.26915887  | 0.3109568  |
| HALLMARK_REACTIVE_OXYGEN_SPECIES_PATHWAY   | 11    | -0.3044539 | -1.0428131 | 0.39259258  | 0.43744707 |
| HALLMARK_ADIPOGENESIS                      | 50    | -0.1438014 | -0.8959451 | 0.6         | 0.61705446 |
| HALLMARK_INTERFERON_GAMMA_RESPONSE         | 26    | -0.1803912 | -0.8810523 | 0.6316726   | 0.61187893 |

ES, Enrichment score

NES, Normalised enrichment score

NOM p-value, Nominal p value

FDR q-value, False discovery rate

\*Number of genes in the the gene set after filtering genes not in the expression dataset

Table S5 Preranked geneset enrichment analysis comparing PKC inhibitor- and control-treated MP46 uveal melanoma cell line

| NAME                                       | SIZE* | ES         | NES        | NOM p-val   | FDR q-val  |
|--------------------------------------------|-------|------------|------------|-------------|------------|
| HALLMARK_CHOLESTEROL_HOMEOSTASIS           | 31    | 0.4290897  | 2.306397   | 0           | 0.00378968 |
| HALLMARK_HEME_METABOLISM                   | 63    | 0.2910889  | 2.024233   | 0           | 0.0285285  |
| HALLMARK_HYPOXIA                           | 77    | 0.263758   | 1.8930992  | 0.003067485 | 0.04445431 |
| HALLMARK_BILE_ACID_METABOLISM              | 23    | 0.38900742 | 1.8605285  | 0.010282776 | 0.04138155 |
| HALLMARK_PROTEIN_SECRETION                 | 17    | 0.39220074 | 1.675445   | 0.03125     | 0.09808318 |
| HALLMARK_UV_RESPONSE_DN                    | 57    | 0.21457396 | 1.3858175  | 0.075075075 | 0.34726754 |
| HALLMARK_PEROXISOME                        | 26    | 0.27230853 | 1.3528056  | 0.12398922  | 0.3439819  |
| HALLMARK_ESTROGEN_RESPONSE_LATE            | 48    | 0.19888447 | 1.2780358  | 0.1516035   | 0.4199991  |
| HALLMARK_FATTY_ACID_METABOLISM             | 38    | 0.21105202 | 1.2242346  | 0.20775624  | 0.46064848 |
| HALLMARK_MYOGENESIS                        | 34    | 0.21957818 | 1.2109303  | 0.23450135  | 0.43586272 |
| HALLMARK_OXIDATIVE_PHOSPHORYLATION         | 30    | 0.17391582 | 0.94078517 | 0.5257453   | 0.97710735 |
| HALLMARK_MITOTIC_SPINDLE                   | 36    | 0.16312295 | 0.92963624 | 0.5472222   | 0.9220528  |
| YAP1_UP                                    | 12    | 0.24012789 | 0.883652   | 0.58468676  | 0.94859964 |
| HALLMARK_XENOBIOTIC_METABOLISM             | 35    | 0.15175939 | 0.8753173  | 0.6440678   | 0.89824003 |
| HALLMARK_KRAS_SIGNALING_DN                 | 22    | 0.17630543 | 0.8267903  | 0.6819338   | 0.92828196 |
| HALLMARK_APICAL_JUNCTION                   | 42    | 0.1345912  | 0.8099711  | 0.73504275  | 0.89840084 |
| HALLMARK_INTERFERON_ALPHA_RESPONSE         | 20    | 0.17890452 | 0.80955493 | 0.6984536   | 0.84599215 |
| HALLMARK_REACTIVE_OXYGEN_SPECIES_PATHWAY   | 11    | 0.22364864 | 0.79789305 | 0.74004686  | 0.8170243  |
| HALLMARK_SPERMATOGENESIS                   | 14    | 0.19400105 | 0.7579023  | 0.7866005   | 0.82765085 |
| HALLMARK_ADIPOGENESIS                      | 51    | 0.11129022 | 0.7082461  | 0.8746594   | 0.8431531  |
| MAPK_Signaling_V2                          | 44    | -0.8099839 | -4.301441  | 0           | 0          |
| MAPK_Signaling_V1                          | 22    | -0.8209446 | -3.5960581 | 0           | 0          |
| HALLMARK_MYC_TARGETS_V2                    | 42    | -0.5987147 | -3.1308978 | 0           | 0          |
| HALLMARK_TNFA_SIGNALING_VIA_NFKB           | 67    | -0.4923871 | -2.9484026 | 0           | 0          |
| HALLMARK_MYC_TARGETS_V1                    | 48    | -0.5019445 | -2.7679687 | 0           | 0          |
| HALLMARK_IL2_STAT5_SIGNALING               | 62    | -0.4172058 | -2.4606175 | 0           | 1.44E-04   |
| HALLMARK_COMPLEMENT                        | 38    | -0.4438678 | -2.2434983 | 0           | 0.00128612 |
| HALLMARK_E2F_TARGETS                       | 34    | -0.4433091 | -2.180279  | 0           | 0.00236925 |
| HALLMARK_UNFOLDED_PROTEIN_RESPONSE         | 34    | -0.4232392 | -2.0777402 | 0.001579779 | 0.00574645 |
| HALLMARK_KRAS_SIGNALING_UP                 | 42    | -0.3664457 | -1.9082967 | 0.001538462 | 0.01732734 |
| HALLMARK_ESTROGEN_RESPONSE_EARLY           | 68    | -0.3127505 | -1.8663133 | 0.003021148 | 0.02171966 |
| HALLMARK_INFLAMMATORY_RESPONSE             | 37    | -0.3520363 | -1.7678642 | 0.017883755 | 0.03652017 |
| HALLMARK_APICAL_SURFACE                    | 13    | -0.4572346 | -1.6191561 | 0.03529412  | 0.08189625 |
| HALLMARK_G2M_CHECKPOINT                    | 43    | -0.3083535 | -1.6066875 | 0.021138212 | 0.08208717 |
| HALLMARK_UV_RESPONSE_UP                    | 33    | -0.3303617 | -1.5914253 | 0.040584415 | 0.08320379 |
| HALLMARK_COAGULATION                       | 31    | -0.3117209 | -1.4907014 | 0.0608      | 0.13600357 |
| HALLMARK_INTERFERON_GAMMA_RESPONSE         | 34    | -0.292433  | -1.4131132 | 0.097484276 | 0.18692973 |
| HALLMARK_ALLOGRAFT_REJECTION               | 22    | -0.3323771 | -1.4076918 | 0.117741935 | 0.1799704  |
| HALLMARK_EPITHELIAL_MESENCHYMAL_TRANSITION | 55    | -0.2409342 | -1.3661352 | 0.12180451  | 0.20427172 |
| HALLMARK_GLYCOLYSIS                        | 56    | -0.2255524 | -1.2684414 | 0.20092024  | 0.29048106 |
| HALLMARK_ANDROGEN_RESPONSE                 | 39    | -0.2430194 | -1.2558959 | 0.19236884  | 0.28920186 |
| HALLMARK_P53_PATHWAY                       | 61    | -0.2146185 | -1.2492586 | 0.20765832  | 0.2835307  |
| HALLMARK_ANGIOGENESIS                      | 12    | -0.3672811 | -1.2491399 | 0.21964286  | 0.27125514 |
| HALLMARK_APOPTOSIS                         | 45    | -0.1977161 | -1.0777413 | 0.37386018  | 0.47284976 |
| HALLMARK_TGF_BETA_SIGNALING                | 18    | -0.2706057 | -1.0672047 | 0.36290324  | 0.46889928 |
| HALLMARK_HEDGEHOG_SIGNALING                | 10    | -0.320671  | -1.0525436 | 0.37900355  | 0.46995527 |
| HALLMARK_MTORC1_SIGNALING                  | 66    | -0.1716411 | -1.0309488 | 0.4136947   | 0.48213208 |
| HALLMARK_WNT_BETA_CATENIN_SIGNALING        | 20    | -0.2313992 | -0.9567328 | 0.5221675   | 0.5675413  |
| HALLMARK_PI3K_AKT_MTOR_SIGNALING           | 30    | -0.2012552 | -0.9552603 | 0.5080645   | 0.55037636 |
| HALLMARK_IL6_JAK_STAT3_SIGNALING           | 13    | -0.2112334 | -0.7569824 | 0.76430976  | 0.79714197 |
| HALLMARK_DNA_REPAIR                        | 14    | -0.1951632 | -0.7313904 | 0.78194207  | 0.799836   |

ES, Enrichment score

NES, Normalised enrichment score

NOM p-value, Nominal p value

FDR q-value, False discovery rate

\*Number of genes in the the gene set after filtering genes not in the expression dataset
